# Supplementary material for: A Comparative Study of the Inhibitory Effect of Some Flavonoids and a Conjugate of Taxifolin with Glyoxylic Acid on the Oxidative Burst of Neutrophils
Source: MDPI journal article supplement (doi:10.3390/ijms242015068), 2023-10-11
Supplement: s1 [file s1]

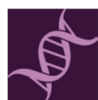

Supplementary Materials

# A Comparative Study of the Inhibitory Effect of Some Flavonoids and a Conjugate of Taxifolin with Glyoxylic Acid on the Oxidative Burst of Neutrophils

Victoria S. Shubina\*, Victoria I. Kozina, and Yuri V. Shatalin\*

Institute of Theoretical and Experimental Biophysics, Russian Academy of Sciences, Institutskaya 3, 142290 Pushchino, Russia

\* Correspondence: shubinavs@iteb.pushchino.ru (V.S.S.); shatalinyuv@iteb.pushchino.ru (Y.V.S.)

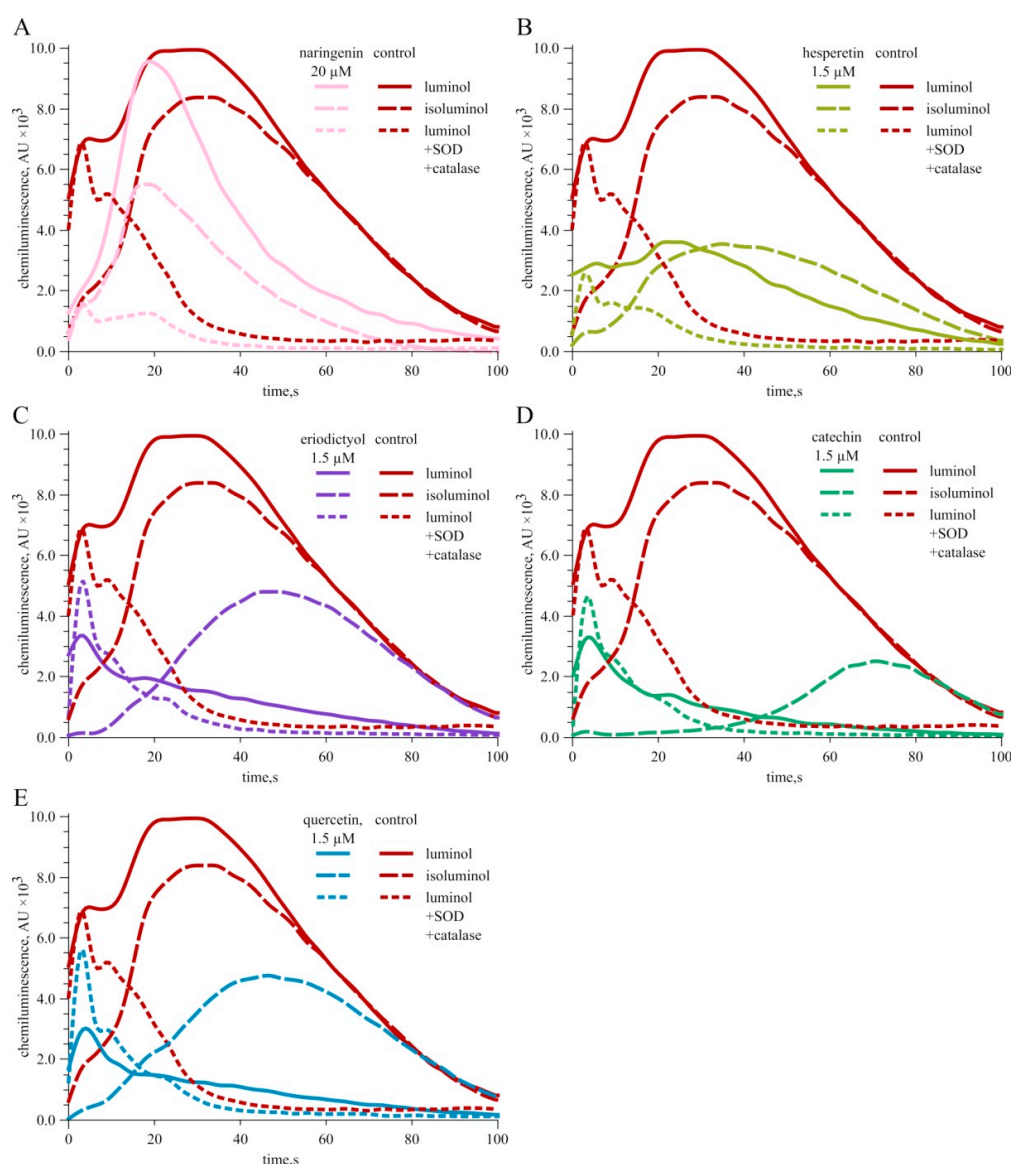

**Figure S1.** Effect of polyphenols on chemiluminescence of neutrophils stimulated with PMA: (A) naringenin; (B) hesperetin; (C) eriodictyol; (D) catechin; (E) quercetin.

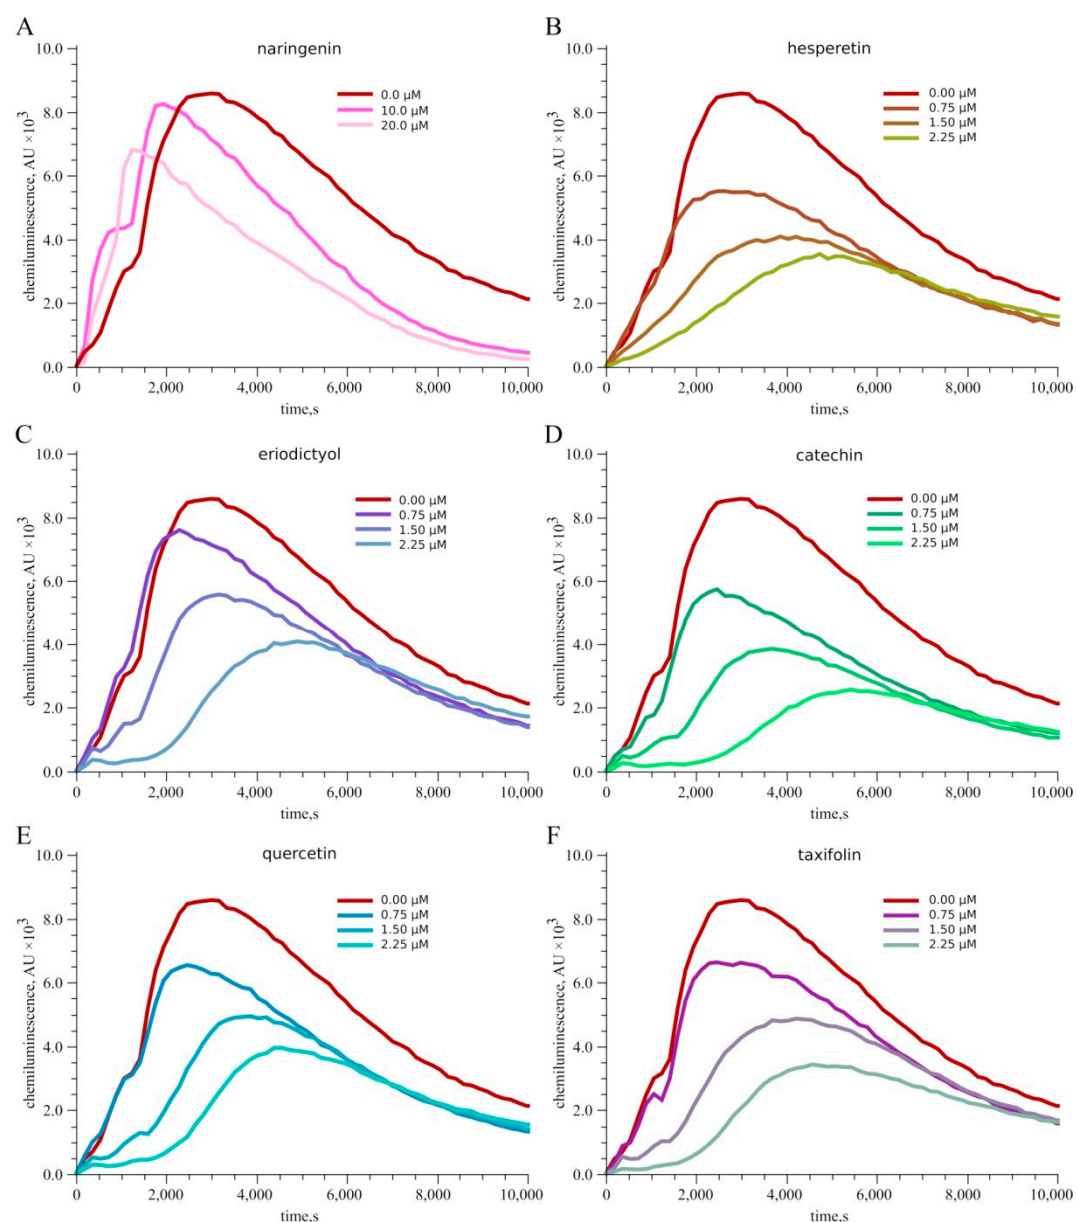

**Figure S2:** Time courses of isoluminol-dependent chemiluminescence of neutrophils in the control and in the presence of different concentrations of flavonoids.

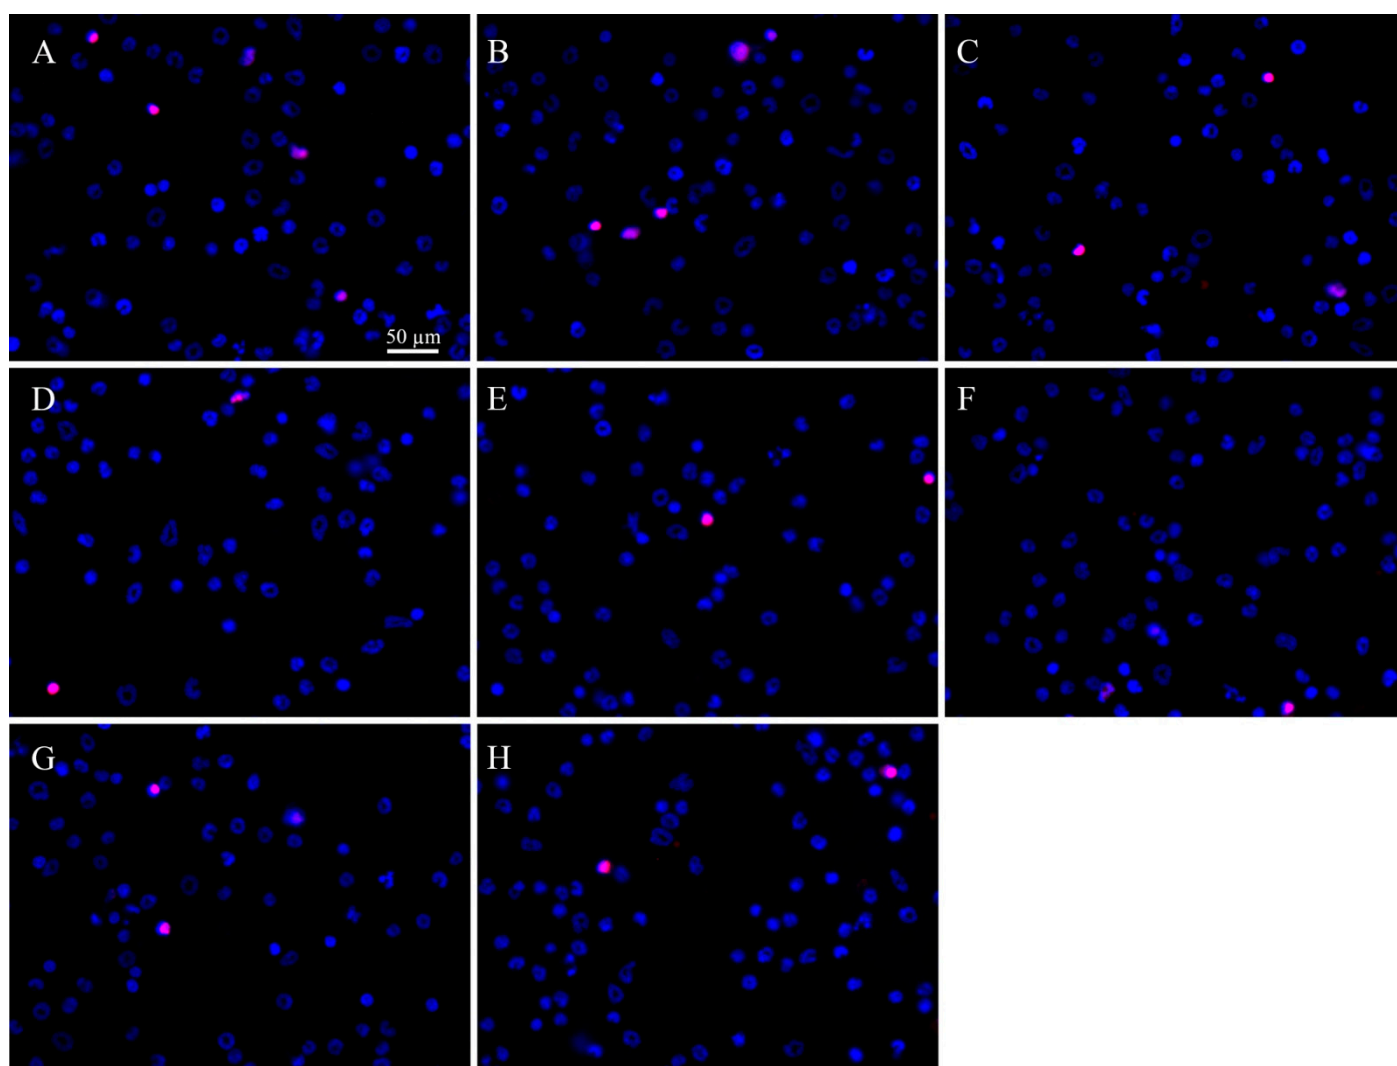

**Figure S3:** Representative fluorescence microscopy images of neutrophils after incubation with polyphenols (50  $\mu$ M) for 3 h: (A) control; (B) DfTf; (C) eriodictyol; (D) quercetin; (E) taxifolin; (F) catechin; (G) hesperetin; (H) naringenin. The cells were stained with Hoechst 33342 (blue) and propidium iodide (red). Hoechst 33342 stained live and dead cell nuclei, whereas propidium iodide stained dead cell nuclei. Scale bar: 50  $\mu$ m.

Materials and Methods S1: the synthesis of the condensation product of taxifolin with glyoxylic acid (DfTf).

The condensation product of taxifolin with glyoxylic acid (DfTf) was synthesized as described previously [1]. Briefly, a mixture of taxifolin (608 mg), glyoxylic acid (148 mg), concentrated hydrochloric acid (20  $\mu$ l) and dry tetrahydrofuran (5 ml) was refluxed for 2 h. The reaction progress was monitored by thin-layer chromatography. After completion of the reaction, the solvent was evaporated under vacuum. The condensation product was isolated in the form of a sodium salt, washed by heated ethanol and dried under vacuum. The structural features of the resulting product were determined by NMR spectroscopy [1].

## References

1. Shubina, V.S.; Shatalin, Y.V. Antioxidant and Iron-Chelating Properties of Taxifolin and Its Condensation Product with Glyoxylic Acid. *J Food Sci Technol* 2017, 54, 1467–1475, doi:10.1007/s13197-017-2573-0.
